# Supplementary material
Source: MDPI journal article supplement (https://www.mdpi.com/2073-4395/12/2/348)
Supplement: s1 [file s1]

## Supplementary data

**Table S1.** Primers used for PCR tests

| Gene           | Forward Primer (5'-3')   | Reverse Primer (5'-3')   |
|----------------|--------------------------|--------------------------|
| <i>GUS</i>     | ACCTCGCATTACCCTTACGCTGAA | ACGCGGTGATACATATCCAGCCAT |
| <i>MsSPL12</i> | CGCACAATCCCCTATCCTTC     | ACCCGAGAACGAGATACAGG     |

**Table S2.** Sequence-specific primers used for qPCR tests

| Gene            | Forward Primer (5'-3') | Reverse Primer (5'-3')  |
|-----------------|------------------------|-------------------------|
| <i>NtActin</i>  | CTGAGGTCCTTTTCCAACCA   | TACCCGGAACATGGTAGAG     |
| <i>NtPMT1a</i>  | AAATGGCACTTCTGAACACCTC | CCCATTCTGGTGGCCGTTCC    |
| <i>NtAO</i>     | TTAACAAAGTCATCCGTCGG   | ATTTAGTCTTGAGGTAGACC    |
| <i>NtQS</i>     | AATCACTGCTTGATGGTATC   | ACTGGCAAGTTCTTGACTC     |
| <i>NtQPT2</i>   | TCACTGCAACAGTGCATCCA   | CTTCAGAGAGTGCAAGTTGC    |
| <i>NtODC2</i>   | AAAACAACACTTCGATGACG   | CCCTATAATCGTCGTTGCC     |
| <i>NtMPO1</i>   | CGATTTATTGAGGTGGTTCTGG | GAAGCTTAGTAGGAATCTGAGAT |
| <i>A662</i>     | GGATGATAGAGGCAGAAGGA   | TGACAACTTTGTCTCTAGGAG   |
| <i>NtBBLa</i>   | GATTTTACTCTAGGAGTACTGC | TGTCTCATTCGATATGGAAAGA  |
| <i>NtMATE1</i>  | TGGCCAAAGAAGTATCTGAG   | TGTAACCCAAAGCAGAATAACA  |
| <i>NtMATE2</i>  | GTGGCCAAAGAAGTATCTAGT  | GTGACCCAAAGCAGAATGATG   |
| <i>NtERF189</i> | GCAGCTTCGACTGCAGCTTCCT | CTCCTCGGACTCGGAGCACTTC  |
| <i>NtERF91</i>  | CTGATCTCTCCGTCCTTG     | GCATTACTAAAACATTGATC    |
| <i>NtMYC2a</i>  | CTTTGGCTGACTGATCCGG    | CAAACACAAGTTGCTTACTGG   |
